# Supplementary material
Source: publisher site journal article supplement (https://www.dovepress.com/article/226631)

**Supplement A: Research Design**

Clinicians were recruited by convenience sampling and advertisement. The HEXACO personality questionnaire2 and Integrative Medicine Attitude Questionnaire (IMAQ)3 were administered by online consenting (n=21). At the end of the survey, the participants were given a choice to leave contact information to participate in an interview. Interviews were performed in-person or by telephone, and the conversation was transcribed. The summative analysis (frequency of codes) was made for 15 interviews. By referencing the concept map,1 directed content analysis7 was performed on six interviews. The initial study protocol and modification were approved by the University's Institutional Review Board.


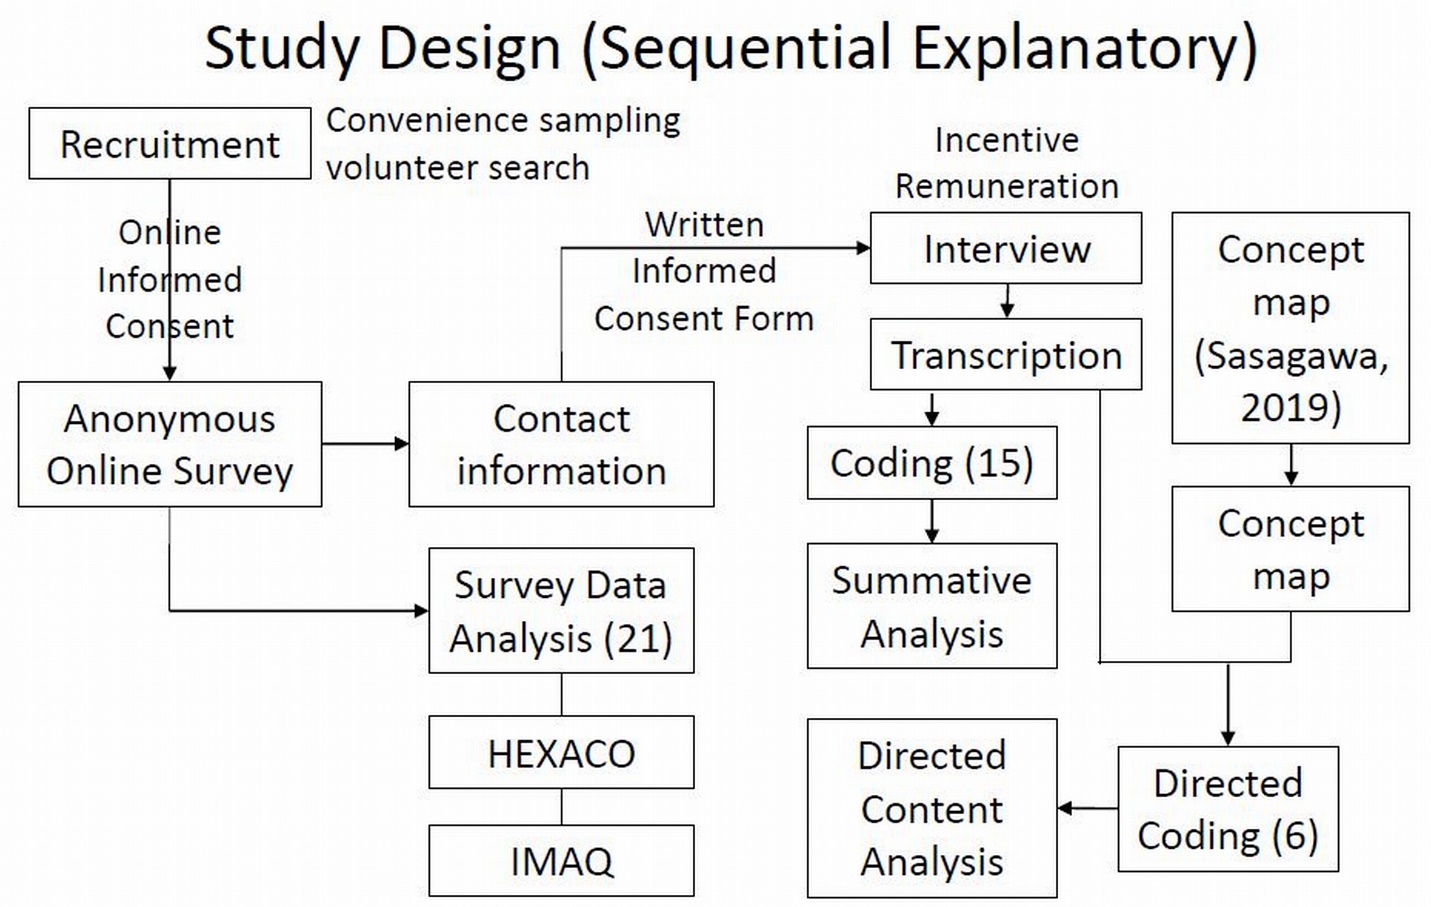


**Supplement B: Summative Codes**

Summative Codes: Positively or negatively stated factors are indicated by “+” or “-“ in an appropriate column. The disposition and/or environmental factors that are a non-directional opinion or comment are indicated by “0”.


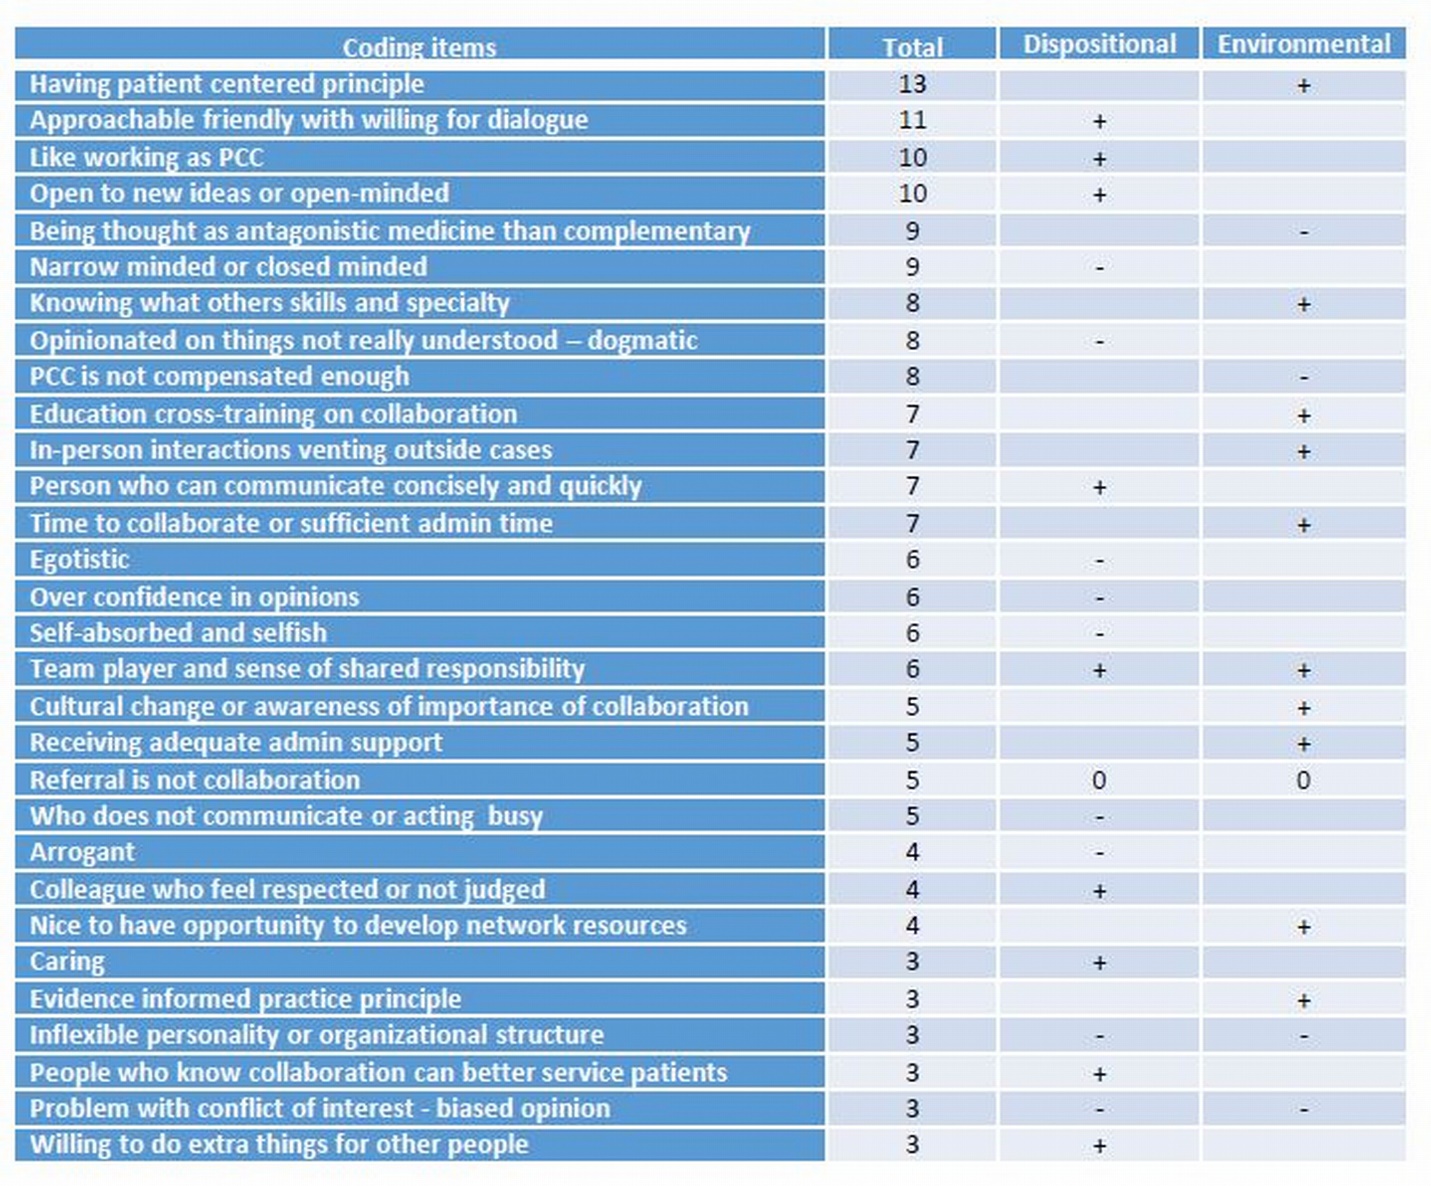

Supplement: Supplementary file 1 [file get_supplementary_file.php]
